# Supplementary material for: Cell-Type-Dependent Recruitment Dynamics of FUS Protein at Laser-Induced DNA Damage Sites
Source: MDPI journal article supplement (doi:10.3390/ijms25063526), 2024-03-20
Supplement: s1 [file s1]

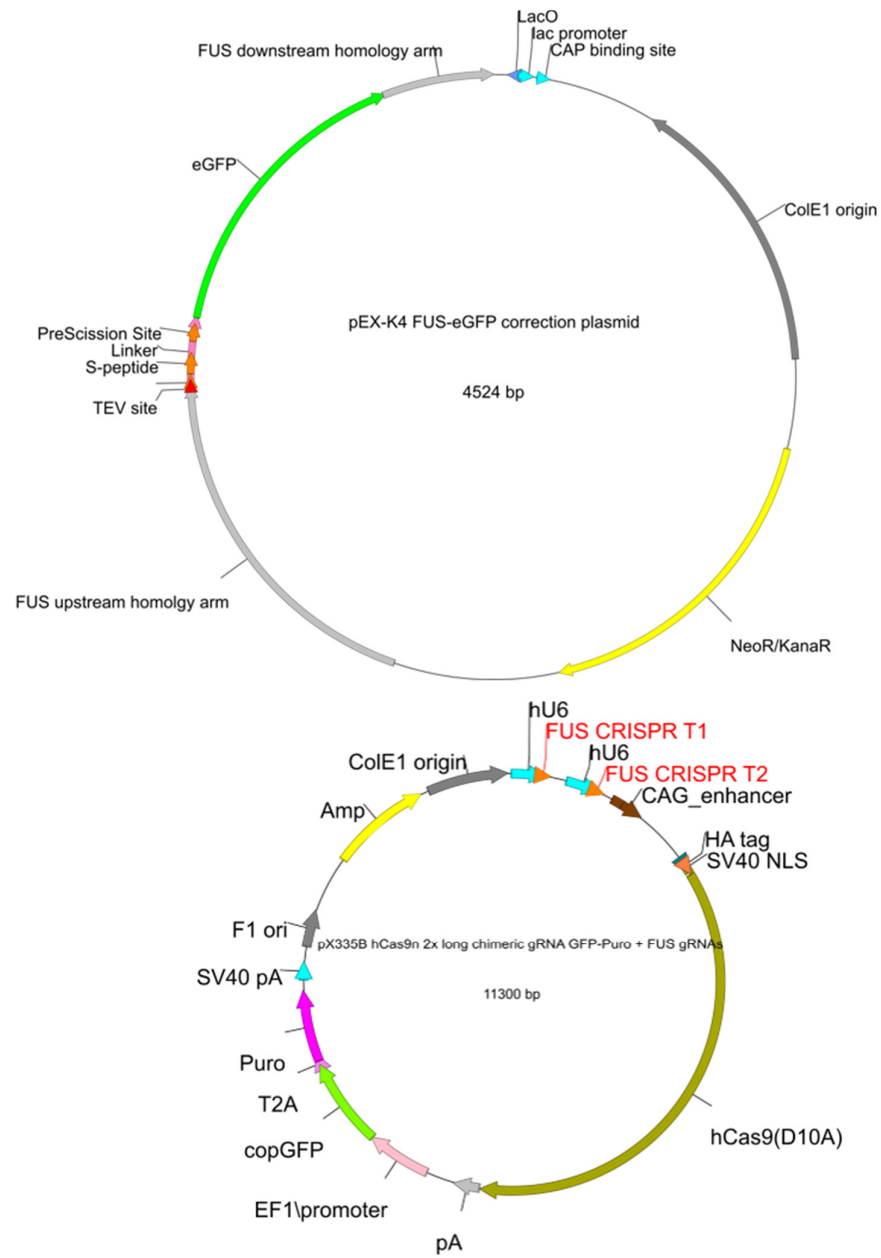

**Figure S1: Plasmids used in this study**

*px335B hCas9n 2x long chimeric gRNA GFP-Puro + FUS gRNAs* is expressing the nikase Cas9n and both gRNAs for the double nicking approach. *pEX-K4 FUS-eGFP correction plasmid* acts as an HDR template containing both up- and downstream homology arms, a linker containing a TEV site, S-peptide, PreScission Site and eGFP.

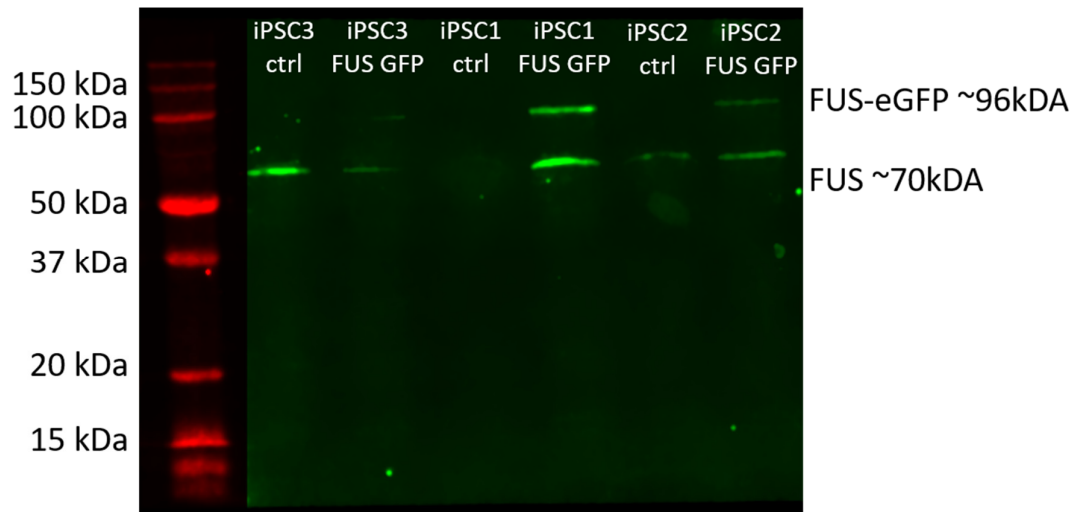

Figure S2: Westernblot after CRISPR mediated genome engineering  
All untreated iPSC line show no FUS-eGFP fusion protein. After successful CRISPR FUS-eGFP is detectable in the Westernblot.

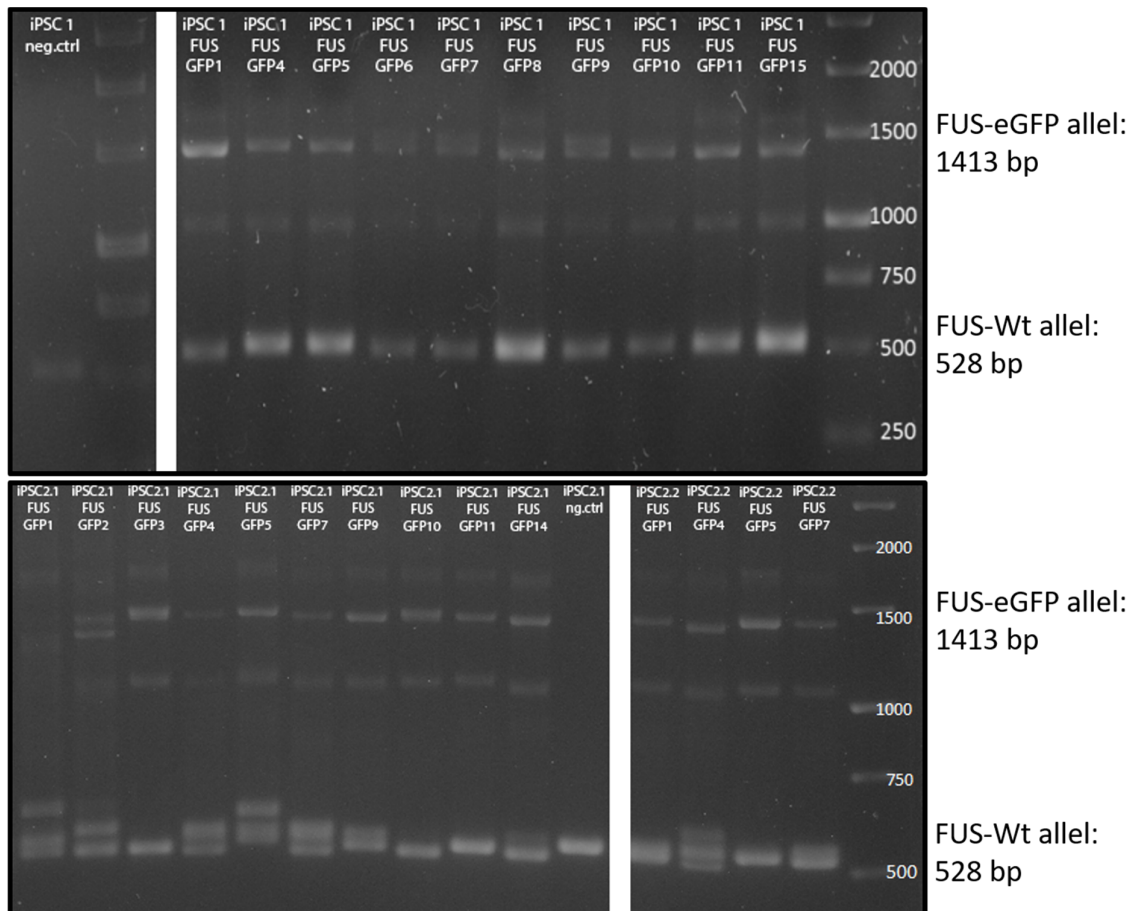

Figure S3: Genotyping PCR results of iPSC1 and iPSC2 lines  
After successful CRISPR a eGFP tagged allele with the size of 1413bp can be observed. The FUS-wt allele is 528 bp and can be seen in the unCRISPRed controls as well as the heterozygous clones. Clones iPSC1 FUS-GFP 5, iPSC2.1 FUS-GFP 5 and iPSC2.2 FUS-GFP 7 have been used in this study.

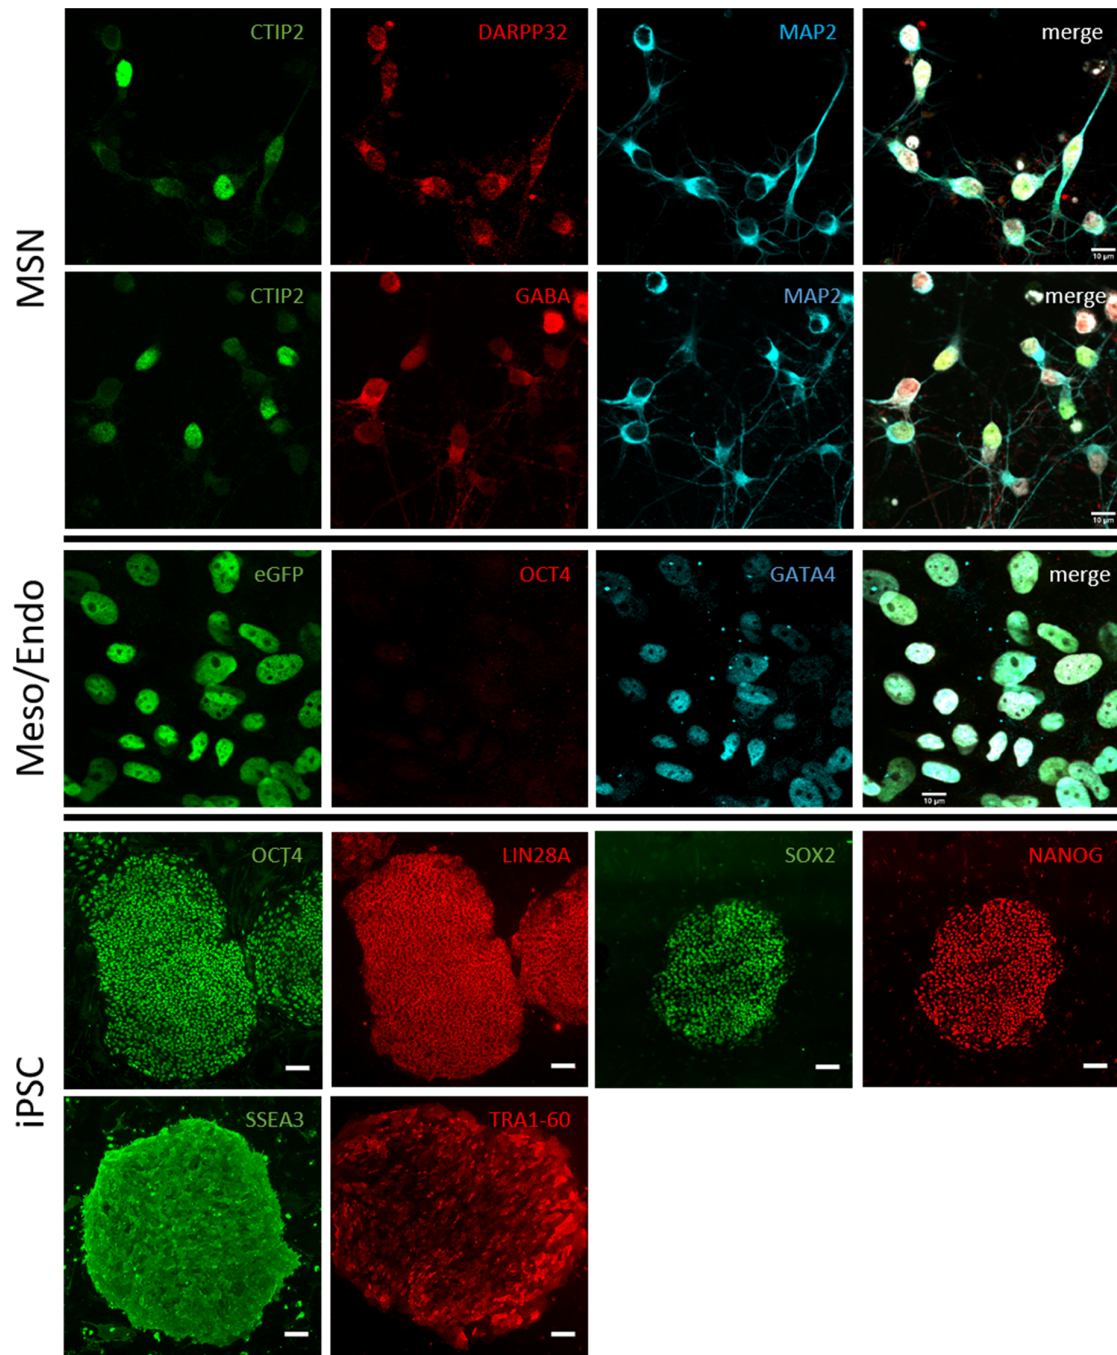

Figure S4: Representative immunofluorescence stainings of the used differentiation models  
 MSN show expression of hallmarks DARPP32, CTIP2 and GABA. Cells differentiated in Meso- / Endodermal lineage lost OCT4 expression and are positive for GATA4. Bonafide iPSC were characterized by positive staining of OCT4, LIN28A, SOX2, NANOG, SSEA3 and TRA1-60. Scale bar for MSN and Meso/Endo represents 10  $\mu\text{m}$ ; Scale bar for iPSC represents 200  $\mu\text{m}$ .
